# Supplementary material
Source: MDPI journal article supplement (https://www.mdpi.com/2035-8377/14/2/42)
Supplement: s1 [file s1]

Table S1. Demographics and clinical data of included studies.

| Reference              | Subjects (women)                 | Age                                          | Type of MS | MS Duration y                                     | EDSS                                            | T2 LV                                                        | Depression Evaluation                                                                      | Cognitive Evaluation                   | Clinical Evaluations                                                  | Disease Modifying Drugs                                                               |
|------------------------|----------------------------------|----------------------------------------------|------------|---------------------------------------------------|-------------------------------------------------|--------------------------------------------------------------|--------------------------------------------------------------------------------------------|----------------------------------------|-----------------------------------------------------------------------|---------------------------------------------------------------------------------------|
| <i>Cross Sectional</i> |                                  |                                              |            |                                                   |                                                 |                                                              |                                                                                            |                                        |                                                                       |                                                                                       |
| [53]                   | F:5(12) NF:9 (8)                 | F:43(27-53)*<br>NF:39(23-53)*                | RRMS       | F:5(1-14)*<br>NF:3(0-9)*                          | F:3(1-3.5)*<br>NF:2(1.5-3.5)*                   | NR                                                           | Major Depression Inventory score $\leq 26$                                                 | DSC<br>F:10<br>NF:10                   | <b>Motor function (CA)</b><br>F:98.1(85.1-100)*<br>NF:99.8(96.9-100)* | F: 6 untreated, 10 interferon, 1 glatiramer acetate<br>NF: 4 untreated, 13 interferon |
| [124]                  | F:9(21)<br>NF:10(20)             | F:41.2(23-54)*<br>NF:40.2(21-62)*            | RRMS       | F:14.5(1-44)*<br>NF:11.5(1-27)*                   | F:2.0(1.0-6.0)*<br>NF:1.5(1-6.0)*               | F:10.1(13.8) mL<br>NF:11.2(12.1) mL                          | Chicago Multiscale Depression Inventory below the cut-off level for the Italian population | PASAT<br>F:34.5<br>NF:34.6             | NR                                                                    | 54: interferon beta-1a/1b glatiramer acetate, 6: natalizumab                          |
| [60]                   | F:10(18)<br>NF:11(20)            | F:40.5(21-62)*<br>NF:39.6(23-54)*            | RRMS       | F:13.8(1-44)*<br>NF:11.2(1-27)*                   | F:2(1-5.5)*<br>NF:1.5(1-6)*                     | F:8.3(12.9)mL<br>NF:11.2(11.8) mL                            | CMDI<italian cut off                                                                       | PASAT-P/PASAT-I:<br>F:22/6<br>NF: 23/8 | NR                                                                    | NR                                                                                    |
| [77]                   | F:15<br>ModeratelyF: 14<br>LF:14 | F:43(2.9)<br>Moderately F39(3)<br>NF:39(1.7) | RRMS       | F:10(1.7)<br>ModeratelyF. 9.2(1.2)<br>NF:8.6(1.9) | F:2(1-4)*<br>ModeratelyF: 2(1-4)*<br>NF:2(1-4)* | F:14(2.5) mL<br>ModeratelyF: 18.8(4.8) mL<br>NF:15.3(5.9) mL | NR                                                                                         | NR                                     | NR                                                                    | MS: fingolimod.                                                                       |
| [50]                   | F:71 NF:81                       | F:33.3(8.2)<br>NF:34.4(8.8)                  | RRMS       | F:9.9(7.1)<br>NF:8.7(6.7)                         | F:3.3(1.8)<br>NF:2.2(1.5)                       | F:9.2(7.9) cm3<br>NF:8.8(7.7) cm3                            | BDI $\leq 18$                                                                              | NR                                     | NR                                                                    | 61: glatiramer acetate 58: natalizumab 33: untreated                                  |

|      |                        |                               |                                                                      |                                 |                                     |    |        |                                            |                                                                                                                                                                                                                 |                                                                                                                                                                                                                                                   |
|------|------------------------|-------------------------------|----------------------------------------------------------------------|---------------------------------|-------------------------------------|----|--------|--------------------------------------------|-----------------------------------------------------------------------------------------------------------------------------------------------------------------------------------------------------------------|---------------------------------------------------------------------------------------------------------------------------------------------------------------------------------------------------------------------------------------------------|
| [96] | F:2(14)<br>NF:4(9)     | F:42.19(11)<br>NF:36.31(9.42) | RRMS                                                                 | F:11.31(9.3)<br>NF:7.92(4.89)   | F:1.37(1.91)<br>NF:1.04(1.35)       | NR | NR     | NR                                         | <b>MSS:</b><br>F:1.84(2.64)<br>NF:1.31(1.96)<br><b>IFS:</b><br>F:23.38(0.53)<br>NF:23.88(1.06)<br>)<br><b>IC-AS:</b><br>F:-0.49(0.83)<br>NF:0.64(0.99)<br><b>EC-AS:</b><br>F:1.09(1.56)<br>NF:1.27(1.63)        | NR                                                                                                                                                                                                                                                |
| [80] | F: 21<br>NF: 17        | F:51(44-67)*<br>NF:53(34-62)* | F: 3 RRMS, 11<br>PPMS, 7<br>SPMS<br>NF: 3 RRMS,<br>5 PPMS, 9<br>SPMS | F:11.90(6.55)<br>NF:11.47(5.30) | F:6.50(5.50-6.50)*<br>NF:6(3-6.50)* | NR | BDI≤19 | SDMT:<br>F:39.43(13.73)<br>NF:44.35(12.59) | <b>HADSanxiety:</b><br>F:6.14(3.47)<br>NF:3.88(1.93)<br><b>HADSdepression:</b><br>F:6.05(2.60)<br>NF:4(2.72)<br><b>TAS:</b><br>F:52.71(9.25)<br>NF:45.35(11.53)<br><b>ESS:</b><br>F:3(1-8.50)*<br>NF:1(1-5.50)* | F: 8<br>untreated 4<br>Dimethyl<br>fumarate, 3<br>Natalizumab<br>, 2,<br>Interferon-β,<br>2<br>Teriflunomide, 1<br>Methotrexate<br>, 1 Rituximab<br><b>NF:</b> 11<br>untreated, 3<br>Natalizumab<br>, 2<br>Fingolimod,<br>1 Glatiramer<br>acetate |
| [99] | F:14 NF:14<br>(19W 9M) | F:39.1(8.9)<br>NF:37.6(6.6)   | RRMS                                                                 | F:6(1-40)*<br>NF:8(3-22)*       | F:1(0-1)*<br>NF:1(0-1)*             | NR | NR     | NR                                         | NR                                                                                                                                                                                                              | NR                                                                                                                                                                                                                                                |

|      |                     |                                      |      |                             |                                  |                                |                                         |                                                                                           |                                                                                                                                                                                                     |                                                                                                                                                                                                                                                                       |
|------|---------------------|--------------------------------------|------|-----------------------------|----------------------------------|--------------------------------|-----------------------------------------|-------------------------------------------------------------------------------------------|-----------------------------------------------------------------------------------------------------------------------------------------------------------------------------------------------------|-----------------------------------------------------------------------------------------------------------------------------------------------------------------------------------------------------------------------------------------------------------------------|
| [54] | F:3(11)<br>NF:6(8)  | F:39.1(8.9)<br>NF:37.6(6.6)          | NR   | F:6(1-40)*<br>NF:8(3-22)*   | F:1(0-1)*<br>NF:1(0-1)*          | F:8.9(10.8)mL<br>NF:7.2(4.7)mL | NR                                      | NR                                                                                        | NR                                                                                                                                                                                                  | NR                                                                                                                                                                                                                                                                    |
| [59] | F:4(11)<br>NF:4(8)  | F:37.3(4.0)<br>NF:36.9(7.5)          | RRMS | F:3.9(4.1)<br>NF:7.1(3.9)   | F:1(0-3)*<br>NF:1(0-2)*          | NR                             | BDI:<br>F:9.3(3.5)<br>NF:6.7(4.2)       | NR                                                                                        | <b>MFIS:</b><br>F:42.1(7.3)<br>NF:19.9(8.6)                                                                                                                                                         | NR                                                                                                                                                                                                                                                                    |
| [39] | F:3(12)<br>NF:4(11) | F:30.4(18-49)*<br>NF:29.9(18-47)*    | RRMS | F:2.8(1-7)*<br>NF:3.7(1-9)* | F:1.5(0-1.5)*<br>NF:1.5(0-1.5)*  | NR                             | MADRS≤16                                | NR                                                                                        | <b>Pyramidal score:</b><br>F:1(0-1)*<br>NF:1(0-1)*                                                                                                                                                  | NR                                                                                                                                                                                                                                                                    |
| [81] | F:3(19)<br>NF:8(19) | F:31.86(6.84)<br>)<br>NF:30.18(6.96) | RRMS | F:7(4.82)<br>NF:5.62(4.79)  | F:2.75(1.5-4)*<br>NF:1.5(0-3.0)* | NR                             | ZDS:<br>F:39.77(8.06)<br>NF:33.59(7.47) | PASAT:<br>F:30.90(12.50)<br>NF:35.88(11.93)<br>SDMT:<br>F:47.27(11.80)<br>NF:54.59(13.28) | <b>EQ5D:</b><br>F:0.69(0.20)<br>NF:0.85(0.13)<br><b>Pyramidal score:</b> F:2(1-3)* NF:1(0-2)<br><b>9HPT:</b><br>F:23.94(4.57)s<br>NF:21.56(3.89)s<br><b>T25FW:</b><br>F:5.17(0.68)<br>NF:4.48(0.76) | F: 7%<br>Intramuscular IFN β-1a 8%<br>Subcutaneous IFN β-1b 4%<br>Subcutaneous IFN β-1a 3%<br>Subcutaneous GA<br><b>NF:</b> 9% %<br>Intramuscular IFN β-1a 8%<br>Subcutaneous IFN β-1b 4%<br>Subcutaneous IFN β-1a 4%<br>Subcutaneous GA 1%<br>Natazumab 1% untreated |

|      |                           |                                 |                                            |                                       |                                 |                                                      |                                                        |                                         |                                                                                                             |                                                                                             |
|------|---------------------------|---------------------------------|--------------------------------------------|---------------------------------------|---------------------------------|------------------------------------------------------|--------------------------------------------------------|-----------------------------------------|-------------------------------------------------------------------------------------------------------------|---------------------------------------------------------------------------------------------|
| [82] | F:1(10)<br>NF:0(6)        | F:38(20-49)*<br>NF:26.5(20-47)* | RRMS                                       | F:4.1(0.3-15.5)*<br>NF:3.15(0.7-4.1)* | F:2(0-3)*<br>NF:1.5(1-2)*       | F:10.56(1.18-40.51)* cm3<br>NF:3.15(1.40-15.75)* cm3 | MADRS:<br>F:7(2-19)<br>NF:9(0-18)                      | NR                                      | <b>Mattis score:</b><br>F:140(133-142)*<br>NF:139.5(134-142)*                                               | NR                                                                                          |
| [62] | F:15<br>NF:14<br>(20W 9M) | F:39.2(8.2)<br>NF:37.6(6.6)     | RRMS                                       | F:7(1-40)*<br>NF:6.5(2-10)*           | F:1(0-1)*<br>NF:1(0-1)*         | MS:8.1(1.1-41.7)*ml                                  | MADRS<16                                               | NR                                      | <b>9HPT:</b><br>F:20.2(2.7)<br>NF:20.5(2.5)<br><b>Max finger tapping rate:</b><br>F:3.4(0.7)<br>NF:3.5(0.5) | NR                                                                                          |
| [55] | F:32(49)<br>NF:28(38)     | F:42.8(11)<br>NF:40.5(10.5)     | RRMS:91<br>PPMS:10<br>SPMS:22<br>Others:24 | F:13.3(9.1)<br>NF:12.1(6.7)           | F:3.5(1-7)*<br>NF:2.5(0-7)*     | F:8.9(10)mL<br>NF:8.4(8)mL                           | MADRS<9                                                | PASAT<br>F:35.9 (0-60)<br>NF:36.5(0-59) | NR                                                                                                          | F:57<br>NF:37                                                                               |
| [56] | F:26(38)<br>NF:26(33)     | F:42.3(10.3)<br>NF:41(10.5)     | RRMS:80<br>PPMS:8<br>SPMS:17<br>Others:18  | F:13.1(1-44)*<br>NF:11.9(1-32)*       | F:2.5(1-7.0)*<br>NF:1.5(0-7.0)* | F:9.7(10.7)<br>NF:8.8(8.3)                           | MADRS<9                                                | PASAT<br>F:35.7(1-59)<br>NF:37.6(1-59)  | NR                                                                                                          | F: 22 IFN, 8 Copaxone 6 Fg 4 Tys, 3 others<br>NF: 15 IFN, 7 Copaxone, 7 Fg, 5 Tys, 0 Others |
| [61] | F:11(21)<br>NF:10(18)     | F:37.72(5.90)<br>NF:34.96(5.87) | RRMS                                       | F:7.44(5.15)<br>NF:5.14(3.69)         | F:3.20(1.68)<br>NF:2.21(1.20)   | F:6.03(14.02) mL<br>NF:3.16(3.97) mL                 | CDMI Total score:<br>F:96.14(29.90)<br>NF:64.11(16.23) | NR                                      | NR                                                                                                          | NR                                                                                          |
| [70] | CF:10(27)<br>CNF:2(10)    | CF:47.2(10.7)<br>CNF:43.8(10.8) | RRMS                                       | CF:9.1(7)<br>CNF:23(11.2)             | CF:3.2(1.5)<br>CNF:4.1(2.7)     | NR                                                   | BDI:<br>CF:13.4(8.5)<br>CNF:5.7(3.3)                   | NR                                      | NR                                                                                                          | F:82%<br>Immunomodulatory treatment<br>NF:72%<br>Immunomod                                  |

|      |                              |                              |                                                                       |                                     |                             |                             |                                                                           |                                       |                                                                                                                                                                                                                                              | ulatory<br>treatment                                                     |
|------|------------------------------|------------------------------|-----------------------------------------------------------------------|-------------------------------------|-----------------------------|-----------------------------|---------------------------------------------------------------------------|---------------------------------------|----------------------------------------------------------------------------------------------------------------------------------------------------------------------------------------------------------------------------------------------|--------------------------------------------------------------------------|
| [98] | F:4(14)<br>NF:18(24)         | F:43.1(6.3)<br>NF:42.9(11.7) | MS:95<br>RRMS:69<br>PPMS:9<br>SPMS:17                                 | F:6.8(6)<br>NF:7.8(8.6)             | F:3.4(2.2)<br>NF:3.1(1.8)   | NR                          | BDI:<br>F:9.9(2)<br>NF:5.3(1.8)                                           | PASAT:<br>F:39(12.3)<br>NF:45.4(11.2) | <b>9HPT:</b><br>F:26.5(11)<br>NF:25.4(8.1)<br><b>TWT:</b><br>F:7.3(3.3)<br>NF:5.8<br><b>Alertness<br/>without<br/>cueing</b><br>F:261.1(39.9)<br>NF:246.6(46.2)<br>)<br><b>Alertness<br/>with cueing:</b><br>F:248.9(38.6)<br>NF:242.1(43.5) | NR                                                                       |
| [72] | CF:20<br>CNF:14<br>(15M 31W) | CF:49.2(7.4)<br>CNF:44(12.9) | RRMS,<br>SPMS                                                         | CF:14.4(6.85)<br>CNF:10.4(7.4)      | CF:3.8(1.5)<br>CNF:2.5(1.9) | NR                          | BDI:<br>CF:3.5(3.0)<br>CNF:2.7(2.5)                                       | NR                                    | <b>MSFC:</b><br>CF:-0.2(0.5)<br>CNF:0(0.5)                                                                                                                                                                                                   | NR                                                                       |
| [71] | CF:19(48)<br>CNF:43(11)      | CF:49(10)<br>CNF:43(11)      | RRMS,<br>SPMS                                                         | CF:12.8(7.3)<br>CNF:10.25(7.1)<br>) | CF:3.7(2)<br>CNF:3.3(3)     | NR                          | BDI mental:<br>CF:8(6)<br>CNF:3(3)<br>BDIIsomatic:<br>CF:6(3)<br>CNF:4(4) | NR                                    | NR                                                                                                                                                                                                                                           | NR                                                                       |
| [63] | F:13(23)<br>NF:37(49)        | F:44.3(12.4)<br>NF:35(11.4)  | F: RRMS:25<br>Progressive:1<br>1<br>NF: RRMS:75<br>Progressive:1<br>1 | F:13.4(9.8)<br>NF:10.8(6.2)         | F:4(0-6.5)*<br>NF:1.5(0-8)* | F:9(8.3)mL<br>NF:5.7(5.3)mL | NR                                                                        | BRB-N<br>battery<br>Data NR           | NR                                                                                                                                                                                                                                           | <b>F:7</b><br>untreated, 14<br>Glatiramer<br>acetate/IFN,<br>15Natalizum |

|      |                                                 |                                                       |                                                                |                                                          |                                                       |                                     |                                           |                                              |                                               |                                                                                                                                       |
|------|-------------------------------------------------|-------------------------------------------------------|----------------------------------------------------------------|----------------------------------------------------------|-------------------------------------------------------|-------------------------------------|-------------------------------------------|----------------------------------------------|-----------------------------------------------|---------------------------------------------------------------------------------------------------------------------------------------|
|      |                                                 |                                                       |                                                                |                                                          |                                                       |                                     |                                           |                                              |                                               | ab/fingolimod<br>NF: 10<br>untreated, 30<br>Glatiramer<br>acetate/IFN,<br>43<br>Natalizumab<br>/fingolimod<br>NR                      |
| [89] | F: 174<br>NF: 192                               | F vs NF:<br>4.62 (2.37,<br>6.86)**                    | F: RRMS:93,<br>PMS: 82<br>NF:<br>RRMS:146<br>PMS: 46           | F vs NF: 0.4 (-<br>1.17, 1.97)**                         | F vs NF: 0.36<br>(0.12, 0.59)**                       | F vs NF:<br>_0.03 (0.14,<br>0.07)** | MADRS: F vs<br>NF: 8.02<br>(6.35, 9.7)**  | PASAT-3: F<br>vs NF: _0.16<br>(0.47, 0.15)** | NR                                            |                                                                                                                                       |
| [52] | F:7(9)<br>NF:4(13)                              | F:41.1(10.9)<br>NF:38(9.4)                            | RRMS                                                           | F:8.4(3.4)<br>NF:7.9(3.8)                                | F:1.8(0.6)<br>NF:1.6(0.6)                             | NR                                  | 17-HDRS:<br>F:6.4(4.8)<br>NF:6.1(4.6)     | MMSE<24                                      | NR                                            | MS: 32<br>immunomodulatory<br>(interferon-beta-1,<br>glatiramer<br>acetate) or<br>immunosuppressive<br>therapy<br>(azathioprine<br>). |
| [83] | F:20<br>NF:11<br>(12M 40W)                      | MS:39(32-<br>43)*                                     | RRMS                                                           | MS:9(3-14)*                                              | MS:2.5(2-<br>3.5)*                                    | NR                                  | NR                                        | NR                                           | NR                                            | MS:<br>8glatiramer<br>acetate                                                                                                         |
| [57] | F:9(18)<br>NF:9(12)                             | F:38.37(7.56)<br>)<br>NF:40.67(10<br>.39)             | RRMS:44<br>SPMS:5                                              | F:9.87(5.86)<br>NF:8.52(6.46)                            | F:2.51(1.45)<br>NF:2.24(2.02)                         | NR                                  | BDI<br>F:12.70(5.96)<br>NF:4.62(3.46)     | NR                                           | tSTAI:<br>F:55.89(7.58)<br>NF:38.80(9.74<br>) | 39 MS:<br>glatiramer<br>acetate, beta-<br>interferon                                                                                  |
| [99] | F:23(77)<br>ReversibleF:2<br>5(75)<br>NF:19(81) | F:48.5(9.2)<br>ReversibleF<br>:51.2(10)<br>NF:51.5(7) | F:RRMS:85%<br>SPMS:15%<br>ReversibleF:<br>RRMS:90%<br>SPMS:10% | F:18.1(6.9)<br>ReversibleF:1<br>5.9(7.6)<br>NF:16.8(8.2) | F:2.3(1.6)<br>ReversibleF:2<br>.1(1.7)<br>NF:1.6(1.6) | NR                                  | CES-D≥16<br>F:14<br>ReversibleF:5<br>NF:1 | NR                                           | NR                                            | NR                                                                                                                                    |

|      |                                                 |                                                           |                                                                                                                 |                                                                  |                                                            |                                         |                                                       |                                      |    |                                                                                                                                                                                                                                                                                                                          |
|------|-------------------------------------------------|-----------------------------------------------------------|-----------------------------------------------------------------------------------------------------------------|------------------------------------------------------------------|------------------------------------------------------------|-----------------------------------------|-------------------------------------------------------|--------------------------------------|----|--------------------------------------------------------------------------------------------------------------------------------------------------------------------------------------------------------------------------------------------------------------------------------------------------------------------------|
|      |                                                 |                                                           | NF:RRMS:93<br>% SPMS:7%                                                                                         |                                                                  |                                                            |                                         |                                                       |                                      |    |                                                                                                                                                                                                                                                                                                                          |
| [84] | F:20(80)<br>ReversibleF:2<br>6(74)<br>NF:22(78) | F:48.9(8.9)<br>ReversibleF:<br>:49.5(9.8)<br>NF:49.4(6.7) | F:RRMS:87%<br>SPMS:13%<br><b>Reversible</b><br>F:RRMS:84%<br>SPMS:13%<br>PPMS:3%<br>NF:RRMS:89<br>%<br>SPMS:11% | F:17.7(6.6)<br>ReversibleF:1<br>6.9(8)<br>NF:17(8.1)             | F:2.3(1.5)<br>ReversibleF:2<br>.0(1.8)<br>NF:1.8(1.0)      | NR                                      | CES-D>16<br>F:15.9(8.7)<br>RF:8.8(7)<br>NF:5.8(4.2)   | NR                                   | NR | <b>F:</b><br>87%disease-<br>modyfyng<br>treatment<br>2monthly<br>intravenous<br>steroids, 1 on<br>immunosup<br>pressant.<br><b>ReversibleF:</b><br>80%disease-<br>modifying<br>treatment<br>2monthly<br>intravenous<br>steroids<br><b>NF:</b><br>92%disease-<br>modifyinf<br>treatment, 1<br>immunosup<br>pressant<br>NR |
| [58] | F:6(20)<br>ReversibleF:<br>6(19)<br>NF:8(34)    | F:48.5(9.2)<br>Reversible<br>F: 51.2 (10)<br>NF: 51.5(7)  | F: RRMS:22<br>SPMS: 4<br>Reversible F:<br>RRMS:22<br>SPMS: 3<br>NF: RRMS:39<br>SPMS: 3                          | F: 17.5(12-22)*<br>Reversible F:<br>13 (12-16)*<br>NF:14(11-21)* | F: 2(1.5-3)*<br>Reversible F:<br>1.5(1-3)*<br>NF:1.5(1-2)* | NR                                      | <b>CES-D≥16:</b><br>F:17<br>Reversible<br>F:8<br>NF:6 | NR                                   | NR |                                                                                                                                                                                                                                                                                                                          |
| [85] | F:8<br>NF:16<br>(7M 17W)                        | MS:45.4(9.7<br>)                                          | RRMS:20<br>SPMS:4                                                                                               | MS:12.6(8.4)                                                     | F:3(1-6.5)*<br>NF:1.5(0-<br>4.5)*                          | MS:9.2(7.5)c<br>m3                      | NR                                                    | NR                                   | NR | NR                                                                                                                                                                                                                                                                                                                       |
| [97] | CF:7(4)<br>CNF:7(4)                             | CF:46.6(9.3)<br>CNF:40(5.8)                               | RRMS                                                                                                            | CF:9.5(3.8)<br>CNF:6(4.4)                                        | CF:2.5(0-3.5)<br>CNF:1.5(0-3)                              | CF:9.1(1.4)m<br>L<br>CNF:3.9(6.9)<br>mL | BDI≤10                                                | <b>PASAT:</b><br>CF:81.2(47-<br>118) | NR | NR                                                                                                                                                                                                                                                                                                                       |

|      |                        |                                   |                                                             |                                     |                                         |                                  |                                     |                   |                                                                                                                                                                                      |                                                                                                                                        |
|------|------------------------|-----------------------------------|-------------------------------------------------------------|-------------------------------------|-----------------------------------------|----------------------------------|-------------------------------------|-------------------|--------------------------------------------------------------------------------------------------------------------------------------------------------------------------------------|----------------------------------------------------------------------------------------------------------------------------------------|
|      |                        |                                   |                                                             |                                     |                                         |                                  |                                     | CNF:103.6(73-118) |                                                                                                                                                                                      |                                                                                                                                        |
| [40] | F:4(6)<br>NF:6(8)      | F:38(7.7)<br>NF:38.6(8.5)         | RRMS                                                        | F:8.2(6.2)<br>NF:10.6(6.6)          | F:1.5(1.5-2)*<br>NF:1.5(0-1.5)*         | F:7.7(5)mL<br>NF:8.9(10.7)<br>mL | MADRS<br>Data NR                    | NR                | NR                                                                                                                                                                                   | NR                                                                                                                                     |
| [65] | F:12 NF:10<br>(5M 17W) | F:34.1(22-42)*<br>NF:33.1(21-44)* | RRMS                                                        | F:6(2-15)*<br>NF:5(2-11)*           | F:1(0-3)*<br>NF:1(0-2)*                 | NR                               | MADRS<16                            | NR                | <b>9-HPT:</b><br>F:22(19-24)*<br>NF:20(17-22)*<br><b>Finger tapping rate:</b><br>F:3.2(2.6-4)*<br>NF:3.5(2.5-3.8)*<br><b>Foot tapping rate:</b><br>F:3.2(2.6-4)*<br>NF:3.1(2.6-3.8)* | NR                                                                                                                                     |
| [66] | F:1(10)<br>NF:1(12)    | F:33.8(6.2)<br>NF:31.2(4.3)       | RRMS                                                        | F:6(2-12)*<br>NF:6(2-10)*           | F:1(0-1.5)*<br>NF:1(0-1.5)*             | F:8.1(8.5)ml<br>NF:8.8(6)ml      | MADRS<9                             | NR                | <b>FSS:</b><br>F:37.7(7.7)<br>NF:15.6(4.8)                                                                                                                                           | <b>MS:</b> 3<br>glatiramer<br>acetate; 21<br>interferon<br>beta<br>NR                                                                  |
| [91] | F:6(14)<br>NF:8(7)     | F:38.8(29-65)*<br>NF:38.8(29-60)* | RRMS                                                        | F:10.5(2-23)*<br>NF:11.2(0.5-27)*   | F:3.5(1.5-5.5)*<br>NF:3(0-5)*           | NR                               | MADRS≤16                            | NR                | NR                                                                                                                                                                                   | NR                                                                                                                                     |
| [76] | F:14(17)<br>NF:15(17)  | F:41(23-63)<br>NF:39.5(27-58)     | <b>F:</b> RRMS:26<br>SPMS:5<br><b>NF:</b> RRMS:30<br>SPMS:2 | F:13(0.6-32)<br>NF: 11.65(0.8-25.5) | F:2.5(1-5.5)<br>NF:2(1-6.5)<br>(median) | F:8.5(8.1)<br>NF:8.7(9.7)        | MADRS<br>F:8(1-17)*<br>NF:10(3-17)* | PASAT<br>Data NR  | NR                                                                                                                                                                                   | F:9interferon<br>s,<br>5glatiramer<br>acetate,<br>7fingolimod,<br>4Natalizuma<br>b<br>NF:14Interfe<br>rons,<br>2Glatiramer<br>acetate, |



|      |                         |                                |                                                                   |                             |                                                                                                               |                             |                                                                                                              |                        |                                                                                                            |                                                                                                                                                                    |
|------|-------------------------|--------------------------------|-------------------------------------------------------------------|-----------------------------|---------------------------------------------------------------------------------------------------------------|-----------------------------|--------------------------------------------------------------------------------------------------------------|------------------------|------------------------------------------------------------------------------------------------------------|--------------------------------------------------------------------------------------------------------------------------------------------------------------------|
|      |                         |                                |                                                                   |                             |                                                                                                               |                             |                                                                                                              |                        |                                                                                                            | 3Fingolimod,<br>5Natalizuma<br>b                                                                                                                                   |
| [64] | F:17(33)<br>NF:10(19)   | F:42.6(11.2)<br>NF:40(9.1)     | RRMS                                                              | F:12.9(8.2)<br>NF:10.6(7.6) | F:2(1-4)*<br>NF:1.5(0-4)*                                                                                     | F:6.2(7.5)mL<br>NF:5.7(6)mL | MADRS<9                                                                                                      | BRB-N<2                | <b>9-HPT:</b><br>F:25(6.5)<br>NF:24.7(5.3)<br><b>Finger<br/>tapping rate:</b><br>F:3.5(0.7)<br>NF:3.5(0.7) | NR                                                                                                                                                                 |
| [67] | F:8(11)<br>NF:7(9)      | F:43(8)<br>NF:42(10)           | F: RRMS:9<br>Others:10<br>NF: RRMS:10<br>Other:6                  | F:10(8)<br>NF:14(8)         | F:3.6(1.3)<br>NF:3.9(1.7)                                                                                     | NR                          | BDI:<br>F:15.6(8)<br>NF:5.2(3.6)                                                                             | NR                     | NR                                                                                                         | NR                                                                                                                                                                 |
| [79] | CF:10(18)<br>CNF:5(9)   | CF:50.5(8.8)<br>CNF:42.8(12.8) | <b>CF:</b> RRMS:18<br>SPMS:10<br><b>CNF:</b><br>RRMS:12<br>SPMS:2 | NR                          | T1:<br><b>CF:</b> 4.14(1.52)<br><b>CNF:</b> 2.63(2.12)<br>T2:<br><b>CF:</b> 3.70(1.46)<br><b>CNF:</b> 3.42(2) | NR                          | BDI<br>Data NR                                                                                               | PASAT<br>Data NR       | <b>MSFC:</b><br>T1:<br>CF:-0.15(0.53)<br>CNF:-0-01(0.48)<br>T2: CF:-0.02(0.50)<br>CNF:0.09(0.60)           | <b>CF:</b> 15.4%untreated,<br>53.8%interferons,<br>30.8%escalated medications<br><b>CNF:</b> 46.7%non medication,<br>40%interferons,<br>13.3%escalated medications |
| [86] | F:43 NF:17<br>(22M 38W) | MS:36.4(9)                     | CIS:22<br>RRMS:28<br>SPMS:5<br>PPMS:5                             | MS:2.66(1-36)*              | MS:2(0-7)*                                                                                                    | MS:34.57(1.2-175.9)*cm3     | Cummings' Neuropsychiatric Inventory, the Hamilton's Depression Rating Scale (<8 points), Hamilton's Anxiety | SDMT, PASAT<br>Data NR | <b>MSFC:</b><br>MS:0.64(0.76)<br><b>BRB-N</b>                                                              | NR                                                                                                                                                                 |

|      |                           |                                    |                                             |                               |                              |                                               | Rating Scale<br>(<br><6<br>points<br>BDIS<16 |                                                                                |                                                                                                                                                                                  |                                                             |
|------|---------------------------|------------------------------------|---------------------------------------------|-------------------------------|------------------------------|-----------------------------------------------|----------------------------------------------|--------------------------------------------------------------------------------|----------------------------------------------------------------------------------------------------------------------------------------------------------------------------------|-------------------------------------------------------------|
| [68] | F:12<br>NF:12<br>(4M 20W) | F:40.9(8.9)<br>NF:38.7(8.1)        | RRMS                                        | MS: 7                         | F:1.5<br>NF:1.5              | NR                                            |                                              | MMSE<24                                                                        | <b>MSFC</b><br><b>MSQOL-54</b><br>Data NR<br>Motor<br>performance<br>Data NR                                                                                                     | NR                                                          |
| [69] | F:3(7)<br>NF:6(6)         | F:27(5.5)<br>NF:25.8(5.4)          | RRMS                                        | F:5.5(3.8)<br>NF:5.8(3.8)     | F:2.3(0-6)*<br>NF:1.16(0-4)* | F:4.7(2.8)<br>NF:12.4(19.6)                   | BDI<br>F:3.3(2.3)<br>NF:1(1.8)               | NR                                                                             |                                                                                                                                                                                  | NR                                                          |
| [92] | F:6(21)<br>NF:8(9)        | F:36.7(9.7)<br>NF:34.5(8.3)        | RRMS                                        | F:6.2(4.5)<br>NF:6.4(6.4)     | F:2.5(0.8)<br>NF:2(1.1)      | NR                                            | BDI-II<br>F:9.7(6.2)<br>NF:3.4(3.3)          | PASAT:<br>F:48.8(8.4)<br>NF:52.2(5.3)<br>SDMT:<br>F:53.5(9.3)<br>NF:55.4(12.3) | <b>PSQI:</b><br>F:5.7(4.5)<br>NF:4.4(1.7)<br><b>ESS:</b><br>F:9(3.5)<br>NF:6.8(4.3)<br><b>JTHFT:</b><br>F: 37.9(5.1)<br>NF:37.3(2.4)<br><b>9-HPT:</b><br>F:15.9(2.1)<br>NF:16(2) | NR                                                          |
| [93] | F:34<br>NF:26             | F:42.12(6.9)<br>NF:38.09(10<br>.2) | F:RRMS:26<br>SPMS:8<br>NF:RRMS:20<br>SPMS:6 | F:10.59(7.3)<br>NF:10.35(9.5) | F:3.81(2.2)<br>NF:2.69(2.2)  | F:13.44(13.4)c<br>m3<br>NF:11.24(13.2<br>)cm3 | NR                                           | NR                                                                             | NR                                                                                                                                                                               | NR                                                          |
| [87] | F:25<br>NF:197            | F:39(9.18)<br>NF:34(9.05)          | RRMS                                        | F:10(6.6)<br>NF:6(5.7)        | EDSS≤2                       | F:17486(1673<br>6.5)<br>NF:7119.8(65<br>71.5) | NR                                           | NR                                                                             | NR                                                                                                                                                                               | NR                                                          |
| [94] | F:4(13)<br>NF:3(10)       | F:38.5(7.6)<br>NF:37.8(9.8)        | RRMS                                        | F:9.3(7.3)<br>NF:7(6.2)       | F:2.5(1-3)*<br>NF:1.5(0-3)*  | NR                                            | BDI<br>F:12.2(8.9)<br>NF:5.6(6.4)            | NR                                                                             | NR                                                                                                                                                                               | NR                                                          |
| [51] | F:3(8)<br>NF:3(6)         | F:38.5(3.2)<br>NF:35.9(7.8)        | RRMS                                        | MS:4.7(3.8)                   | F:0.4(0.5)<br>NF:0.3(0.5)    | F:11(8,3)cm3<br>NF:17.2(8.1)c<br>m3           | BDI<br>F:8.3(3.2)<br>NF:6.2(4.3)             | NR                                                                             | 9-HPT<br>F:19.2(3.2)<br>NF:19.1(2.1)                                                                                                                                             | <b>F:5 INF</b><br><b>betaIb, 3 INF</b><br><b>beta Ia, 1</b> |

|      |                      |                                 |      |                           |                                   |                                                 |         |                                                                                                                                                                                                                                                                                                                                                                                                                   |    |                                                                                                                                                                                                                                                                                                            |
|------|----------------------|---------------------------------|------|---------------------------|-----------------------------------|-------------------------------------------------|---------|-------------------------------------------------------------------------------------------------------------------------------------------------------------------------------------------------------------------------------------------------------------------------------------------------------------------------------------------------------------------------------------------------------------------|----|------------------------------------------------------------------------------------------------------------------------------------------------------------------------------------------------------------------------------------------------------------------------------------------------------------|
| [75] | F:8(30)<br>NF:15(26) | F:34.5(20-58)*<br>NF:30(17-54)* | RRMS | F:2(0-10)*<br>NF:2(0-10)* | F:1.50(0-5.5)*<br>NF:0.50(0-3.5)* | F:3.54(0.38-41.18)*mL<br>NF:1.85(0.14-30.58)*mL | HADS≤10 | <b>SDMT:</b><br>F:-0.65(-3.67-2.04) NF:-0.19(-2.46-2.22)<br><b>TAP-alertness:</b><br>F:0(-2-1.30) NF:0.10(-1.60-2)<br><b>PASAT-3:</b><br>F:-0.39(-4.74-1.1) NF:0.04(-3.23-1.31)<br><b>Bloc span:</b><br>F: -0.20 (-1.50 to 2.00) NF:0.20 (-1.60-2.40)<br><b>VLMT Dg 5:</b><br>F:0.13(-2.48-1.17) NF:0.36 (-1.44-1.17)<br><b>VLMT Dg7:</b><br>F: 0.23 (-2.74-1.28) NF:0.63(-1.40-1.43)<br><b>VLMT recognition:</b> | NR | Natalizumab, 1 no untreated.<br>NF:2 INF beta Ib, 6 INF beta Ia, 2 Cop-I, 1 untreated<br>F: 10 untreated, 10 interferons, 8 glatiramer acetate, 6 natalizumab, 3 fingolimod, 1 dimethylfumarate<br>NF: 14 untreated, 15 interferons, 5 glatiramer acetate, 6 natalizumab, 1 fingolimod, 0 dimethylfumarate |
|------|----------------------|---------------------------------|------|---------------------------|-----------------------------------|-------------------------------------------------|---------|-------------------------------------------------------------------------------------------------------------------------------------------------------------------------------------------------------------------------------------------------------------------------------------------------------------------------------------------------------------------------------------------------------------------|----|------------------------------------------------------------------------------------------------------------------------------------------------------------------------------------------------------------------------------------------------------------------------------------------------------------|

F:0.08(−4.01-0.94)  
NF:0.39(−2.13-0.78)  
**TMT-A:** F: −0.20 (−3.00-1.50)  
**TMT-B:** F: −0.13 (−3.00-1.26)  
**RWT lexical:**  
F: −0.30 (−2.00-1.60)  
NF: 0.30 (−2.00-1.60)

|      |                    |                                  |      |                                 |                                  |                                                  |                |    |    |    |
|------|--------------------|----------------------------------|------|---------------------------------|----------------------------------|--------------------------------------------------|----------------|----|----|----|
| [95] | F:10<br>NF:9(17)   | F:42(8)<br>NF:38(5)              | RRMS | NR                              | F: 1.8(1-2.5)*<br>NF:1.5(1-1.5)* | NR                                               | BDI<br>Data NR | NR | NR | NR |
| [83] | F:4(19)<br>NF:1(8) | F:40(32-42.5)*<br>NF: 36(32-39)* | RRMS | F:10(3.5-12.5)*<br>NF:6(2-12m)* | F:3(2.5-4)*<br>NF:2(2-2.5)*      | F:3.53(1.66-11.72)*cm3<br>NF:3.94(1.98-4.83)*cm3 | NR             | NR | NR | NR |

*Note. The data reported the mean (SD) value. \*indicate the range instead of SD.*

**Legend.** BRB-N battery: Brief Repeatable Battery of Neuropsychological Tests; CA: central activation; CF: patients with cognitive fatigue; CNF: patients without cognitive fatigue; EC-AS: exteroceptive condition-accuracy score; EDSS: expanded disability status scale; EQ5D: EuroQol-5D quality of life questionnaire; ESS: Epworth sleepiness scale; F patients with fatigue; FSS: Fatigue Severity Scale; HADS: Hospital anxiety and depression scale; 9-HPT: 9-Hole peg Test; IC-AS: Interoceptive Condition-accuracy score; IFN: interferon; JTHFT: Jebsen-Taylor hand function test; MS: patients affected by multiple sclerosis; MSFC: Multiple Sclerosis functional composite; MSQOL-54: Multiple Sclerosis Quality of Life-54; MFIS: modified fatigue impact scale; MS: patients affected by Multiple Sclerosis; MSSS: Multiple sclerosis severity score; NF patients without fatigue; NR not reported; PSQI: Pittsburgh sleep quality index; TAS: Toronto alexithymia scale; tSTAI: Trait part of the Spielberger State Trait Anxiety Inventory; TWT: timed walk test; T25FW: timed 25-foot walk test; T1: time 1; T2: time 2.

1. Andreasen AK, Jakobsen J, Soerensen L, Andersen H, Petersen T, Bjarkam CR, Ahdidan J: **Regional brain atrophy in primary fatigued patients with multiple sclerosis.** *Neuroimage* 2010, **50**(2):608-615.
2. Biseco A, Caiazzo G, d'Ambrosio A, Sacco R, Bonavita S, Docimo R, Cirillo M, Pagani E, Filippi M, Esposito F *et al*: **Fatigue in multiple sclerosis: The contribution of occult white matter damage.** *Mult Scler* 2016, **22**(13):1676-1684.
3. Biseco A, Nardo FD, Docimo R, Caiazzo G, d'Ambrosio A, Bonavita S, Capuano R, Sinisi L, Cirillo M, Esposito F *et al*: **Fatigue in multiple sclerosis: The contribution of resting-state functional connectivity reorganization.** *Mult Scler* 2018, **24**(13):1696-1705.
4. Bernitsas E, Yarraguntla K, Bao F, Sood R, Santiago-Martinez C, Govindan R, Khan O, Seraji-Bozorgzad N: **Structural and Neuronal Integrity Measures of Fatigue Severity in Multiple Sclerosis.** *Brain Sci* 2017, **7**(8).
5. Calabrese M, Rinaldi F, Grossi P, Mattisi I, Bernardi V, Favaretto A, Perini P, Gallo P: **Basal ganglia and frontal/parietal cortical atrophy is associated with fatigue in relapsing-remitting multiple sclerosis.** *Mult Scler* 2010, **16**(10):1220-1228.
6. Campo CG, Salamone PC, Rodriguez-Arriagada N, Richter F, Herrera E, Bruno D, Cassara FP, Sinay V, Garcia AM, Ibanez A *et al*: **Fatigue in multiple sclerosis is associated with multimodal interoceptive abnormalities.** *Mult Scler J* 2019.
7. Chalah MA, Kuv P, Creange A, Hodel J, Lefaucheur JP, Ayache SS: **Neurophysiological, radiological and neuropsychological evaluation of fatigue in multiple sclerosis.** *Mult Scler Relat Disord* 2019, **28**:145-152.
8. Codella M, Rocca MA, Colombo B, Martinelli-Boneschi F, Comi G, Filippi M: **Cerebral grey matter pathology and fatigue in patients with multiple sclerosis: a preliminary study.** *J Neurol Sci* 2002, **194**(1):71-74.
9. Codella M, Rocca MA, Colombo B, Rossi P, Comi G, Filippi M: **A preliminary study of magnetization transfer and diffusion tensor MRI of multiple sclerosis patients with fatigue.** *J Neurol* 2002, **249**(5):535-537.
10. Cogliati Dezza I, Zito G, Tomasevic L, Filippi MM, Ghazaryan A, Porcaro C, Squitti R, Ventriglia M, Lupoi D, Tecchio F: **Functional and structural balances of homologous sensorimotor regions in multiple sclerosis fatigue.** *J Neurol* 2015, **262**(3):614-622.
11. Colombo B, Martinelli Boneschi F, Rossi P, Rovaris M, Maderna L, Filippi M, Comi G: **MRI and motor evoked potential findings in nondisabled multiple sclerosis patients with and without symptoms of fatigue.** *J Neurol* 2000, **247**(7):506-509.
12. Damasceno A, Damasceno BP, Cendes F: **Atrophy of reward-related striatal structures in fatigued MS patients is independent of physical disability.** *Mult Scler* 2016, **22**(6):822-829.
13. Derache N, Grassiot B, Mezenge F, Emmanuelle Dugue A, Desgranges B, Constans JM, Defer GL: **Fatigue is associated with metabolic and density alterations of cortical and deep gray matter in Relapsing-Remitting-Multiple Sclerosis patients at the earlier stage of the disease: A PET/MR study.** *Mult Scler Relat Disord* 2013, **2**(4):362-369.
14. Filippi M, Rocca MA, Colombo B, Falini A, Codella M, Scotti G, Comi G: **Functional magnetic resonance imaging correlates of fatigue in multiple sclerosis.** *Neuroimage* 2002, **15**(3):559-567.
15. Gobbi C, Rocca MA, Pagani E, Riccitelli GC, Pravata E, Radaelli M, Martinelli-Boneschi F, Falini A, Copetti M, Comi G *et al*: **Forceps minor damage and co-occurrence of depression and fatigue in multiple sclerosis.** *Mult Scler* 2014, **20**(12):1633-1640.

16. Gobbi C, Rocca MA, Riccitelli G, Pagani E, Messina R, Preziosa P, Colombo B, Rodegher M, Falini A, Comi G *et al*: **Influence of the topography of brain damage on depression and fatigue in patients with multiple sclerosis.** *Mult Scler* 2014, **20**(2):192-201.
17. Cruz Gomez AJ, Ventura Campos N, Belenguer A, Avila C, Forn C: **Regional brain atrophy and functional connectivity changes related to fatigue in multiple sclerosis.** *PLoS One* 2013, **8**(10):e77914.
18. Hanken K, Eling P, Kastrup A, Klein J, Hildebrandt H: **Integrity of hypothalamic fibers and cognitive fatigue in multiple sclerosis.** *Mult Scler Relat Disord* 2015, **4**(1):39-46.
19. Hanken K, Eling P, Klein J, Klaene E, Hildebrandt H: **Different cortical underpinnings for fatigue and depression in MS?** *Mult Scler Relat Disord* 2016, **6**:81-86.
20. Hanken K, Manousi A, Klein J, Kastrup A, Eling P, Hildebrandt H: **On the relation between self-reported cognitive fatigue and the posterior hypothalamic-brainstem network.** *Eur J Neurol* 2016, **23**(1):101-109.
21. Hanken K, Francis Y, Kastrup A, Eling P, Klein J, Hildebrandt H: **On the role of the amygdala for experiencing fatigue in patients with multiple sclerosis.** *Mult Scler Relat Disord* 2018, **20**:67-72.
22. Hidalgo de la Cruz M, d'Ambrosio A, Valsasina P, Pagani E, Colombo B, Rodegher M, Falini A, Comi G, Filippi M, Rocca MA: **Abnormal functional connectivity of thalamic sub-regions contributes to fatigue in multiple sclerosis.** *Mult Scler* 2018, **24**(9):1183-1195.
23. Marchesi O, Vizzino C, Meani A, Conti L, Riccitelli GC, Preziosa P, Filippi M, Rocca MA: **Fatigue in multiple sclerosis patients with different clinical phenotypes: a clinical and magnetic resonance imaging study.** *Eur J Neurol* 2020, **27**(12):2549-2560.
24. Morgante F, Dattola V, Crupi D, Russo M, Rizzo V, Ghilardi MF, Terranova C, Girlanda P, Quartarone A: **Is central fatigue in multiple sclerosis a disorder of movement preparation?** *Journal of Neurology* 2011, **258**(2):263-272.
25. Niepel G, Tench Ch R, Morgan PS, Evangelou N, Auer DP, Constantinescu CS: **Deep gray matter and fatigue in MS: a T1 relaxation time study.** *J Neurol* 2006, **253**(7):896-902.
26. Palotai M, Mike A, Cavallari M, Strammer E, Orsi G, Healy BC, Schregel K, Illes Z, Guttman CR: **Changes to the septo-fornical area might play a role in the pathogenesis of anxiety in multiple sclerosis.** *Mult Scler* 2018, **24**(8):1105-1114.
27. Palotai M, Cavallari M, Koubiyar I, Morales Pinzon A, Nazeri A, Healy BC, Glanz B, Weiner HL, Chitnis T, Guttman CR: **Microstructural fronto-striatal and temporo-insular alterations are associated with fatigue in patients with multiple sclerosis independent of white matter lesion load and depression.** *Mult Scler* 2019:1352458519869185.
28. Palotai M, Nazeri A, Cavallari M, Healy BC, Glanz B, Gold SM, Weiner HL, Chitnis T, Guttman CRG: **History of fatigue in multiple sclerosis is associated with grey matter atrophy.** *Sci Rep* 2019, **9**(1):14781.
29. Palotai M, Small C, Makris N, Somes NG, Pinzon AM, Rath Y, Marzullo A, Levitt JJ, Bakshi R, Chitnis T *et al*: **Microstructural Changes in the Left Mesocorticolimbic Pathway are Associated with the Comorbid Development of Fatigue and Depression in Multiple Sclerosis.** *J Neuroimaging* 2021.
30. Pellicano C, Gallo A, Li X, Ikonomidou VN, Evangelou IE, Ohayon JM, Stern SK, Ehrmantraut M, Cantor F, McFarland HF *et al*: **Relationship of cortical atrophy to fatigue in patients with multiple sclerosis.** *Arch Neurol* 2010, **67**(4):447-453.

31. Pravata E, Zecca C, Sestieri C, Caulo M, Riccitelli GC, Rocca MA, Filippi M, Cianfoni A, Gobbi C: **Hyperconnectivity of the dorsolateral prefrontal cortex following mental effort in multiple sclerosis patients with cognitive fatigue.** *Mult Scler* 2016, **22**(13):1665-1675.
32. Riccitelli G, Rocca MA, Forn C, Colombo B, Comi G, Filippi M: **Voxelwise assessment of the regional distribution of damage in the brains of patients with multiple sclerosis and fatigue.** *AJNR Am J Neuroradiol* 2011, **32**(5):874-879.
33. Rocca MA, Agosta F, Colombo B, Mezzapesa DM, Falini A, Comi G, Filippi M: **fMRI changes in relapsing-remitting multiple sclerosis patients complaining of fatigue after IFNbeta-1a injection.** *Hum Brain Mapp* 2007, **28**(5):373-382.
34. Rocca MA, Gatti R, Agosta F, Broglio P, Rossi P, Riboldi E, Corti M, Comi G, Filippi M: **Influence of task complexity during coordinated hand and foot movements in MS patients with and without fatigue. A kinematic and functional MRI study.** *J Neurol* 2009, **256**(3):470-482.
35. Rocca MA, Absinta M, Valsasina P, Copetti M, Caputo D, Comi G, Filippi M: **Abnormal cervical cord function contributes to fatigue in multiple sclerosis.** *Mult Scler* 2012, **18**(11):1552-1559.
36. Rocca MA, Parisi L, Pagani E, Copetti M, Rodegher M, Colombo B, Comi G, Falini A, Filippi M: **Regional but not global brain damage contributes to fatigue in multiple sclerosis.** *Radiology* 2014, **273**(2):511-520.
37. Rocca MA, Meani A, Riccitelli GC, Colombo B, Rodegher M, Falini A, Comi G, Filippi M: **Abnormal adaptation over time of motor network recruitment in multiple sclerosis patients with fatigue.** *Mult Scler* 2016, **22**(9):1144-1153.
38. Roelcke U, Kappos L, Lechner-Scott J, Brunnschweiler H, Huber S, Ammann W, Plohm A, Dellas S, Maguire RP, Missimer J *et al*: **Reduced glucose metabolism in the frontal cortex and basal ganglia of multiple sclerosis patients with fatigue: a 18F-fluorodeoxyglucose positron emission tomography study.** *Neurology* 1997, **48**(6):1566-1571.
39. Sander C, Eling P, Hanken K, Klein J, Kastrup A, Hildebrandt H: **The Impact of MS-Related Cognitive Fatigue on Future Brain Parenchymal Loss and Relapse: A 17-Month Follow-up Study.** *Front Neurol* 2016, **7**:155.
40. Sepulcre J, Masdeu JC, Goni J, Arrondo G, Velez de Mendizabal N, Bejarano B, Villoslada P: **Fatigue in multiple sclerosis is associated with the disruption of frontal and parietal pathways.** *Mult Scler* 2009, **15**(3):337-344.
41. Specogna I, Casagrande F, Lorusso A, Catalan M, Gorian A, Zugna L, Longo R, Zorzon M, Naccarato M, Pizzolato G *et al*: **Functional MRI during the execution of a motor task in patients with multiple sclerosis and fatigue.** *Radiol Med* 2012, **117**(8):1398-1407.
42. Stefancin P, Govindarajan ST, Krupp L, Charvet L, Duong TQ: **Resting-state functional connectivity networks associated with fatigue in multiple sclerosis with early age onset.** *Mult Scler Relat Disord* 2019, **31**:101-105.
43. Svolgaard O, Andersen KW, Bauer C, Madsen KH, Blinkenberg M, Selleberg F, Siebner HR: **Cerebellar and premotor activity during a non-fatiguing grip task reflects motor fatigue in relapsing-remitting multiple sclerosis.** *PLoS One* 2018, **13**(10):e0201162.
44. Tartaglia MC, Narayanan S, Francis SJ, Santos AC, De Stefano N, Lapierre Y, Arnold DL: **The relationship between diffuse axonal damage and fatigue in multiple sclerosis.** *Arch Neurol* 2004, **61**(2):201-207.

45. Tedeschi G, Dinacci D, Lavorgna L, Prinster A, Savettieri G, Quattrone A, Livrea P, Messina C, Reggio A, Servillo G *et al*: **Correlation between fatigue and brain atrophy and lesion load in multiple sclerosis patients independent of disability.** *J Neurol Sci* 2007, **263**(1-2):15-19.
46. Tellez N, Alonso J, Rio J, Tintore M, Nos C, Montalban X, Rovira A: **The basal ganglia: a substrate for fatigue in multiple sclerosis.** *Neuroradiology* 2008, **50**(1):17-23.
47. Tomasevic L, Zito G, Pasqualetti P, Filippi M, Landi D, Ghazaryan A, Lupoi D, Porcaro C, Bagnato F, Rossini P *et al*: **Cortico-muscular coherence as an index of fatigue in multiple sclerosis.** *Mult Scler* 2013, **19**(3):334-343.
48. Wilting J, Rolfsnes HO, Zimmermann H, Behrens M, Fleischer V, Zipp F, Groger A: **Structural correlates for fatigue in early relapsing remitting multiple sclerosis.** *Eur Radiol* 2016, **26**(2):515-523.
49. Zaini WH, Giuliani F, Beaulieu C, Kalra S, Hanstock C: **Fatigue in Multiple Sclerosis: Assessing Pontine Involvement Using Proton MR Spectroscopic Imaging.** *PLoS One* 2016, **11**(2):e0149622.
50. Zellini F, Niepel G, Tench CR, Constantinescu CS: **Hypothalamic involvement assessed by T1 relaxation time in patients with relapsing-remitting multiple sclerosis.** *Mult Scler* 2009, **15**(12):1442-1449.
